# Supplementary material
Source: PubMed Central journal article supplement (PMC5210720)
Supplement: supp_pp.16.01219_PP2016-01219R2_Supplemental_Materialfigs.pdf [file supp_pp.16.01219_PP2016-01219R2_Supplemental_Materialfigs.pdf]

# SERK1/2 Acts as a Partner of EMS1 to Control Anther Cell Fate Determination in Arabidopsis

## Supplemental Data

### Supplemental Figure S1

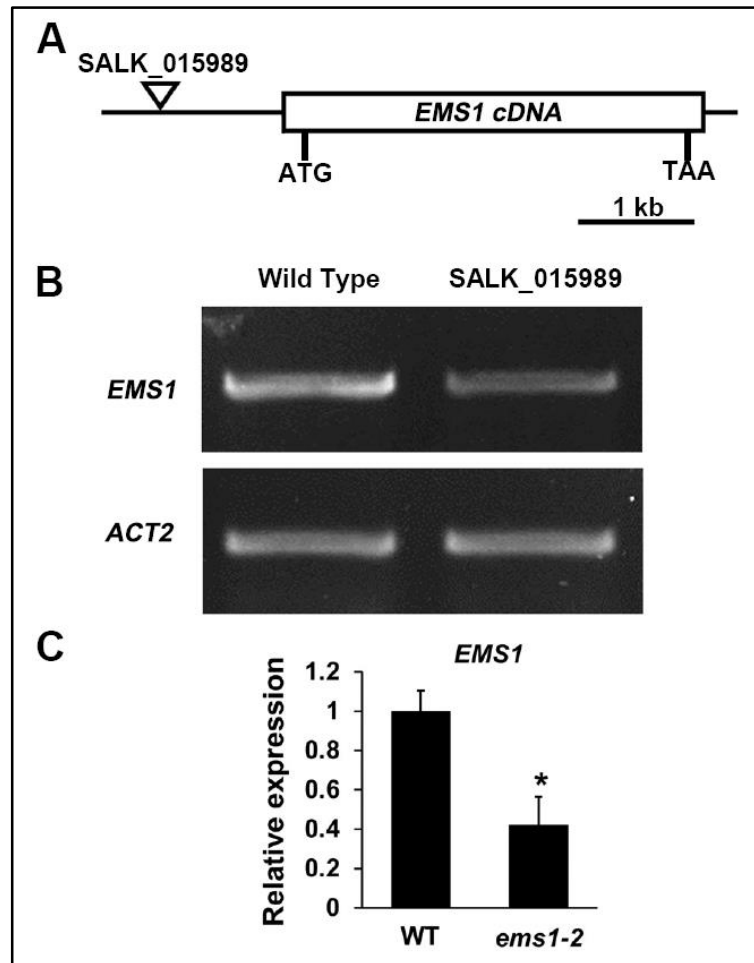

#### Supplemental Figure S1. Identification of the *ems1-2* weak allele.

A, The schematic structure of the *EMS1* gene and the position of T-DNA insertion in the *ems1-2* mutant. The open frame represents the *EMS1* single exon. B, RT-PCR result showing expression of *EMS1* and *ACTIN2* (*ACT2*, internal control) genes in anthers from wild-type and *ems1-2* (SALK\_051989) plants. C, qRT-PCR result showing expression of *EMS1* anthers from wild-type and *ems1-2* (SALK\_051989) plants. The *EMS1* gene expression is reduced in *ems1-2* anthers compared with that of wild type.

Supplemental Figure S2

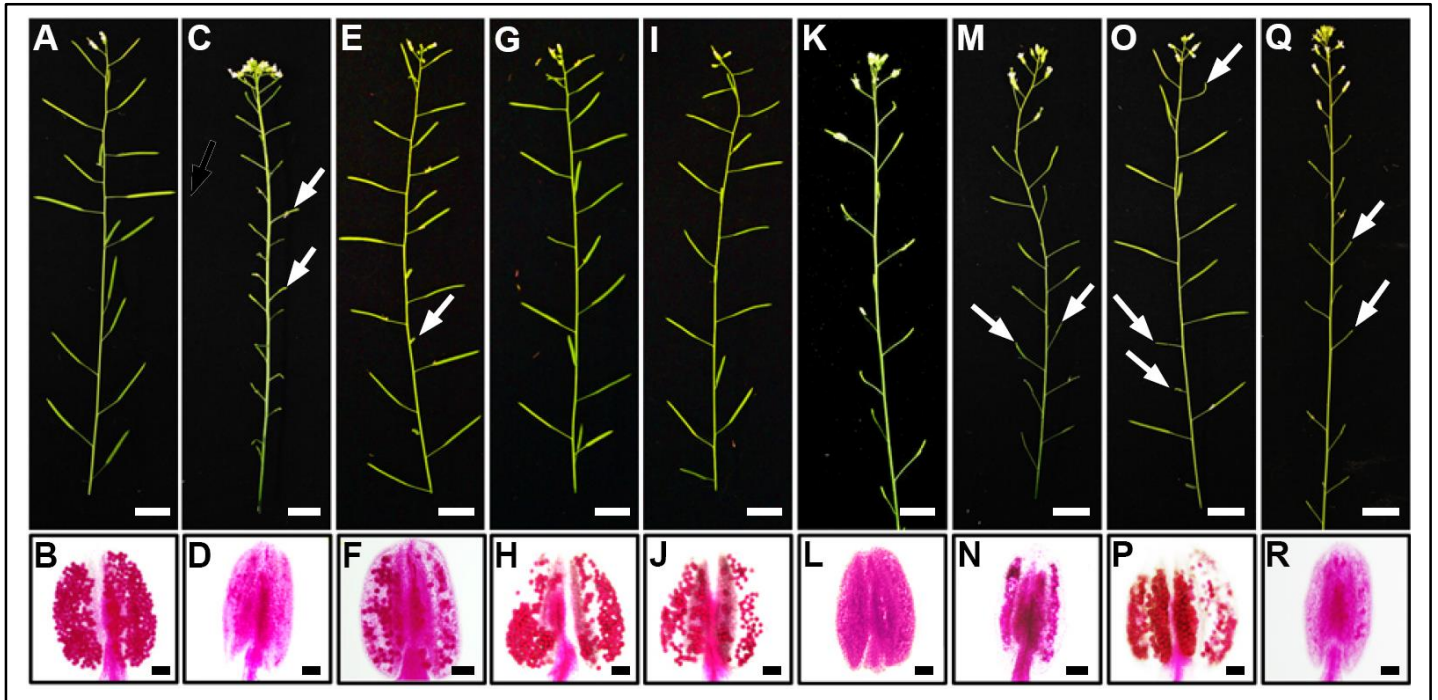

**Supplemental Figure S2.** Fertilities of wild type, *ems1-1*, *ems1-2*, *serk1-1*, *serk2-1*, *serk1-1 serk2-1*, *ems1-2 serk1-1*, *ems1-2 serk2-1*, *ems1-1 serk1-1 serk2-1* plants.

A and B, The wild type plant showing fully elongated siliques (A) and viable pollen grains in the anther (B). C and D, The strong *ems1-1* mutant plant exhibiting short siliques (C, arrows) and no pollen grains (D). E and F, The weak *ems1-2* mutant plant displaying some short siliques (E, arrow) and a reduced amount of pollen grains from partially sterile anthers (F). G-J, The *serk1-1* mutant (G, H) has a similar phenotype to *serk2-1* (I, J), both showing fully elongated siliques (G, I) and viable pollen grains (H, J). K and L, The *serk1-1 serk2-1* double mutant plant exhibiting short siliques (K) and no pollen grains (L). M and N, The *ems1-2 serk1-1* double mutant plant showing that siliques were short (M, arrows) and there was no pollen in sterile anthers (N). O and P, The *ems1-2 serk2-1* double mutant plant exhibiting some short siliques (O, arrows) and a reduced amount of pollen grains (P). Q and R, The *ems1-1 serk1-1 serk2-1* triple mutant plant showing short siliques (Q, arrows) and no pollen grains (R). Scale bars, 1 cm (A, C, E, G, I, K, M, O and Q); 50  $\mu$ m (B, D, F, H, J, L, N, P and R).

Supplemental Figure S3

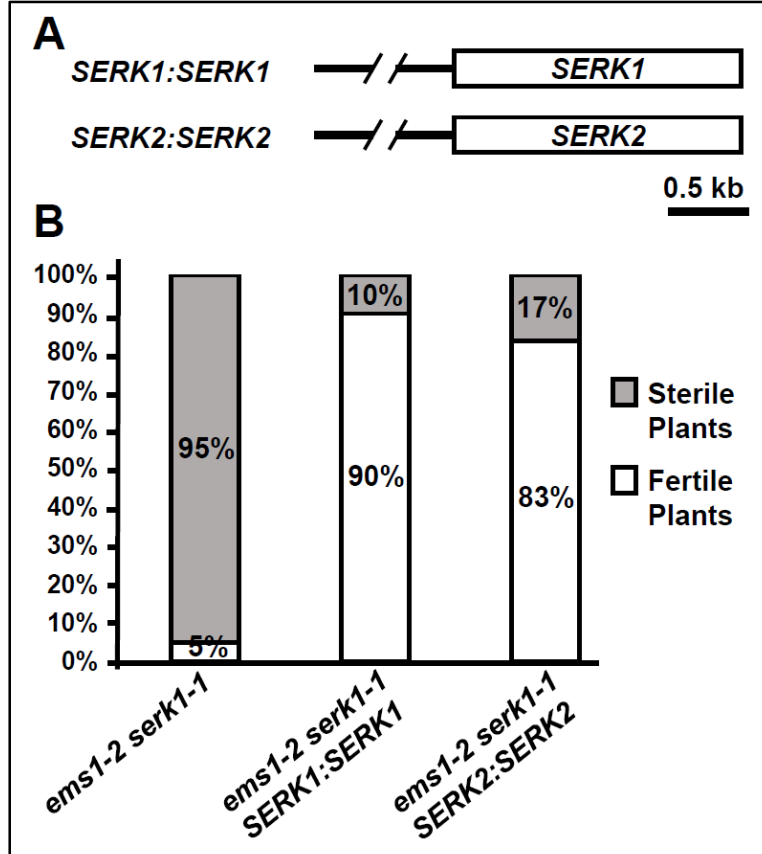

**Supplemental Figure S3.** Functional redundancy of *SERK1* and *SERK2* in rescuing *ems1-2 serk1-1* male sterile phenotype.

A, Schematic structures of constructs used for transforming *ems1-2 serk1-1<sup>+/-</sup>* double mutant plants. B, Analysis of plant fertility rescued by *SERK1* and *SERK2* in the *ems1-2 serk1-1* double mutant background. Values are the means of 40 independent lines grown under the same condition.

Supplemental Figure S4

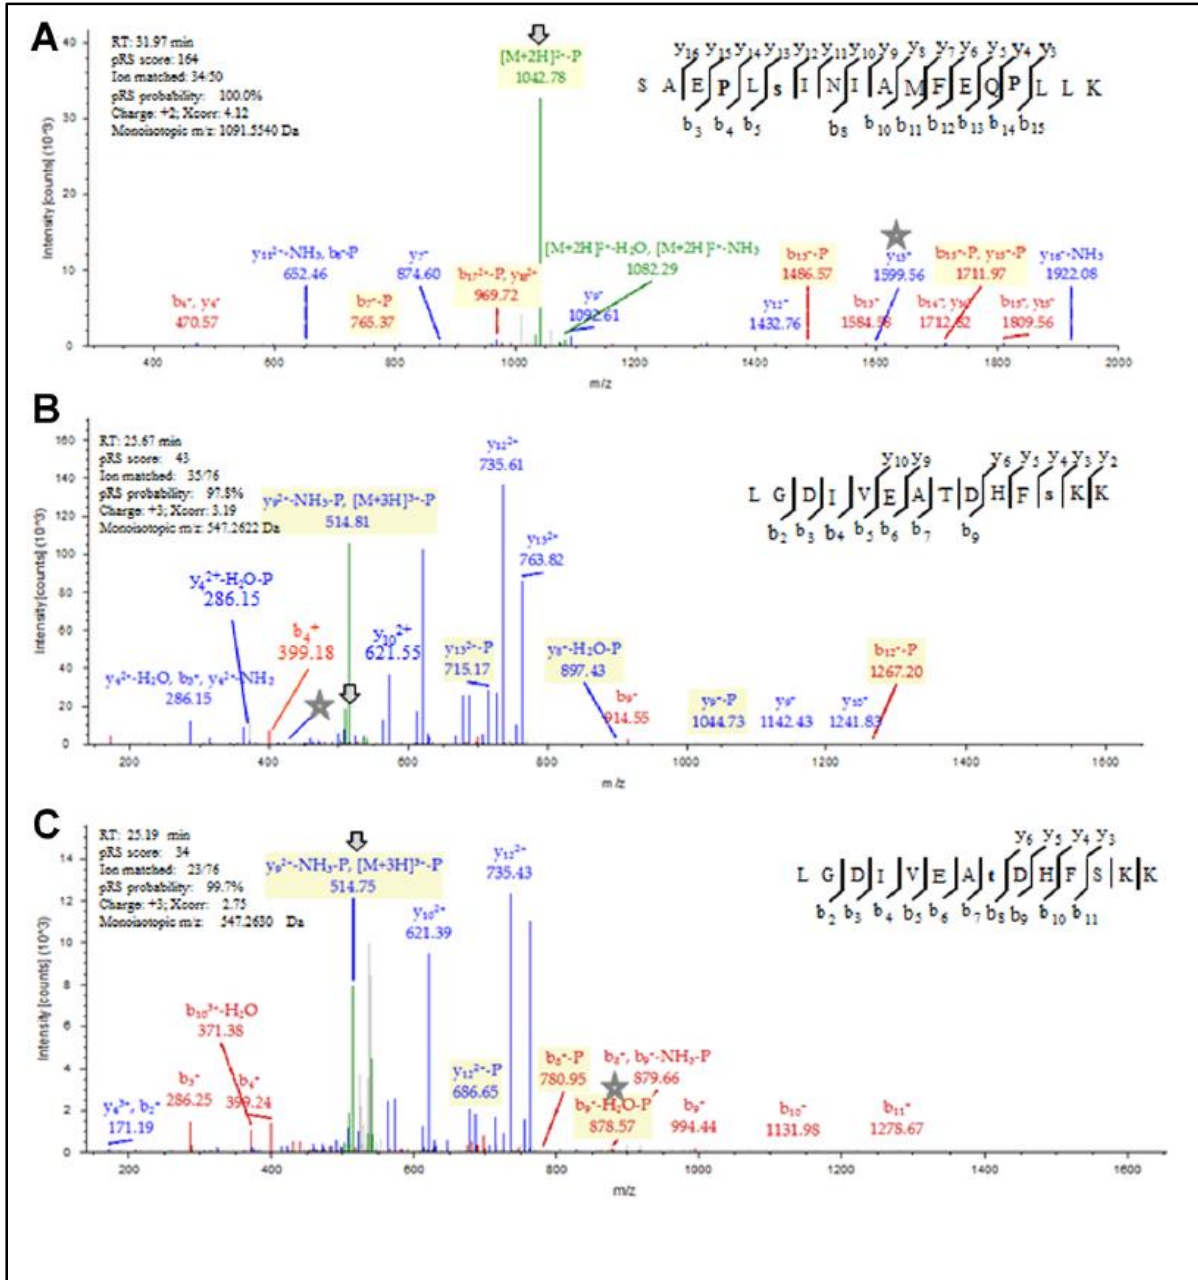

**Supplemental Figure S4.** Representative MS/MS spectra for identifying *in vitro* auto- and trans-phosphorylation sites in the EMS1 kinase domain.

A, The double-charged phosphopeptide SREPLSIINIAMFEQPLLK providing evidence of auto-phosphorylation Ser-892 at the EMS1 kinase domain. B and C, The triple-charged peptide LGDIVEATDHFSSKK corresponding to Thr-914 and Ser-918 providing evidence of trans-phosphorylated sites. Arrow and asterisks indicating the detection of the neutral loss of the

phosphate on fragments or precursor ions and the phosphorylated sites, respectively. The tryptic peptide was fragmented by CID using LTQ XL Orbitrap MS.

### Supplemental Figure S5

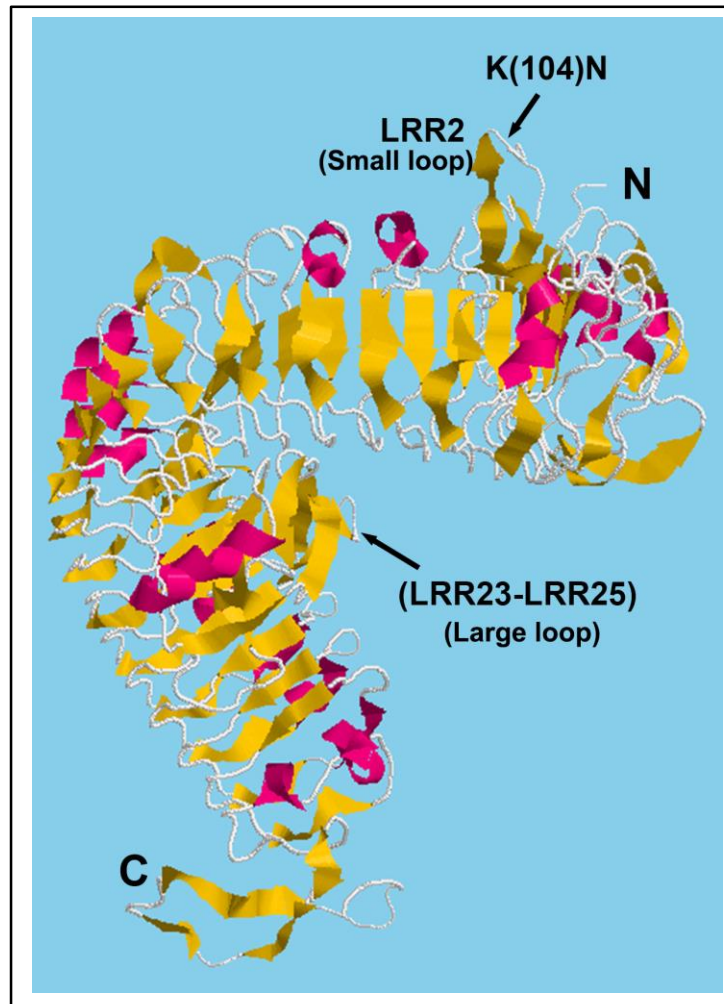

**Supplemental Figure S5.** The simulated structure of the EMS1 LRR domain.

The showing structure was generated by RaptorX (<http://raptorx.uchicago.edu/>). The 3D model of the EMS1 LRR domain was built based on the crystal structure of BRI1 LRR domain.  $\beta$ -sheets are shown in orange and  $\alpha$  helices in red. Two loops are formed by LRR2 (the small loop) and LRR23-25 (the large loop), respectively. The *exs-2* mutation [K(104)N] in the small loop results in the same phenotype as the null mutant *ems1-1*.

## Supplemental Figure S6

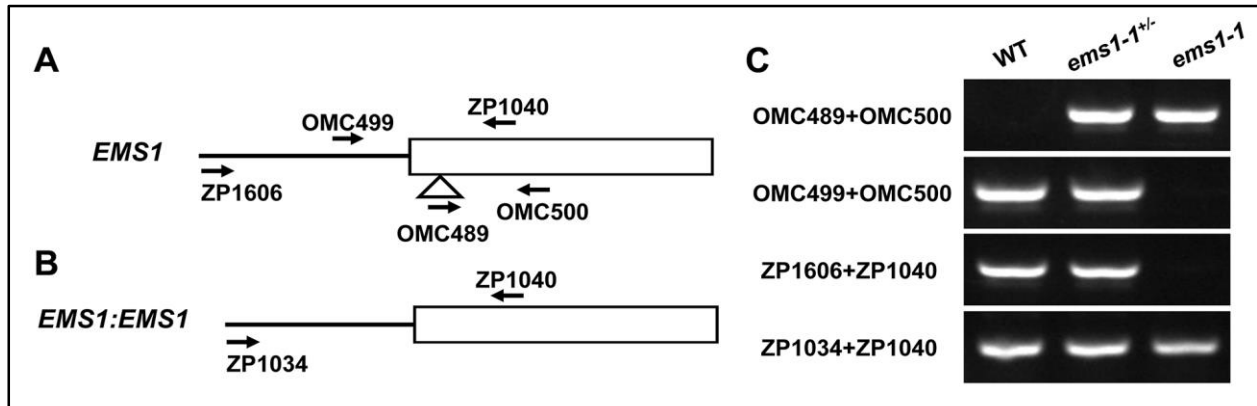

**Supplemental Figure S6.** Genotyping of *EMS1:EMS1* transgenic plants in the *ems1-1* mutant background.

A and B, Schematic diagrams showing the *EMS1* gene, the *Ds* location (A), the *EMS1* transgene (B), and primers for detecting *Ds* and the *EMS1* transgene. C, PCR results.

## Supplemental Figure S7

|         |                |                   |                  |                     |
|---------|----------------|-------------------|------------------|---------------------|
|         | 854            | 869               | 883              | 892                 |
| EMS1_CD | LRRWAM         | TKRVKQRDDPERMEE   | SRLKGFVDONLYFL   | SGSRSPREPL          |
| BRI1_CD | GREMRKRRRKKEAE | LEMYAEGHNSGDR     | TANNTNWKLTGVKEAL | SINLAAFEKPLRKLTF    |
| BRL1_CD | ----           | VRKVQKKEQKREKY    | IESLPTSG-----    | SCSWKLSVPEPL        |
| BRL2_CD | ----           | VRARRRDADDAKML    | HSLQAVN-----     | SATTWKIEKEKEPL      |
| BRL3_CD | -LYRARKVQKKEKQ | REKYIESLPTSG----- | SSSWKLSVHEPL     | SINVATFEKPLRKLTF    |
| FLS2_CD | ----           | TCCKKKEKKIENSSES  | -----            | SLPDLDSALKLKRFEF    |
| HAE_CD  | -----          | MFIACR-----       | KLRAKLS--        | STLAASKWRSFHKLHF    |
|         | 914            | 918               | 930              | 941                 |
| EMS1_CD | GDIVEA         | TDHFSKKNII        | IGDGGFGT         | VYKACL              |
| BRI1_CD | ADLLQA         | TNGFHNDSLIG       | SGGFGDVYKAIL     | KDGSVAVAIKKLIHVS    |
| BRL1_CD | AHLLEA         | TNGFSAETMVG       | SGGFGEVYKAQL     | RDGSSVVAIKKLIRIT    |
| BRL2_CD | SQLEA          | TNGFSAASMIGH      | GGFGEVFKATL      | KDGSVAVAIKKLIRL     |
| BRL3_CD | AHLLEA         | TNGFSADSMIG       | SGGFGDVYKAKL     | ADGSSVVAIKKLIQV     |
| FLS2_CD | KELEQA         | TDNFNSANI         | IGSSSLSTVYKQ     | LEDGTVI             |
| HAE_CD  | SEH-EI         | ADCLDEKNVIG       | FSSGKVYKVEL      | LRGGEVVAVKLNKSVKGGD |
|         |                |                   |                  | DEYSSDSLNRDV        |
| EMS1_CD | FMAEMETL       | GKVKHPNLV         | SLLGYCS-         | FSEEKLLVY           |
| BRI1_CD | FMAEMETI       | GKIKHRNLV         | PLLGYCK-         | VGDERLLVY           |
| BRL1_CD | FMAEMETI       | GKIKHRNLV         | PLLGYCK-         | VGEERLLVY           |
| BRL2_CD | FMAEME         | TLGKIKHRNLV       | PLLGYCK-         | IGEERLLVY           |
| BRL3_CD | FMAEMETI       | GKIKHRNLV         | PLLGYCK-         | IGEERLLVY           |
| FLS2_CD | FYTEAKT        | LSQLKHRNLV        | KILGFAWE         | SGKTKALVLP          |
| HAE_CD  | FAAEVETL       | GTIRHKSIV         | RLWCCCS-         | SGDCKLLVY           |
|         |                |                   |                  | EMPNGSLADVLHGDR--   |
|         |                |                   |                  | KGGVVLGW            |
|         |                |                   |                  | 1069                |
| EMS1_CD | SKRLKIAVGA     | ARGLAFLHHGF       | IPHIIHRDIKAS     | NILLDGFEPKVAD       |
|         |                |                   |                  | FGLARL---           |
|         |                |                   |                  | I                   |
|         |                |                   |                  | SAC                 |

```

BRI1_CD      STRRKIAIGSARGLAFLHHNCSPHIIHRDMKSSNVLLDENLEARVSDFGMARL---MSAM
BRL1_CD      AARKKIAIGAARGLAFLHHSCIPHIIHRDMKSSNVLLDEDFEARVSDFGMARL---VSAL
BRL2_CD      EERKKIAKGAAGKLCFLHHNCIPHIIHRDMKSSNVLLDQDMEARVSDFGMARL---ISAL
BRL3_CD      SARKKIAIGAARGLAFLHHSCIPHIIHRDMKSSNVLLDQDFVARVSDFGMARL---VSAL
FLS2_CD      LEKIDLCVHIASGIDYLHSGYGFPIVHCDLKPANILLSDSRVAHVSDFGTARILGFREDG
HAE_CD       PERLRIALDAAEGLSYLHHCVPPIVHRDVKSSNILLSDSDYGAQVADFGIAKVG-QMSG
1073 1076 1077
EMS1_CD      ESHVST-VIAGTFGYIPPEYQGSARATTKGDVYSFGVILLELVTGKEPTGP-DFKESEGG
BRI1_CD      DTHLSVSTLAGTPGYVPPEYYQSFRCSTKGDVYSYGVVLELLTGKRPTDSPDFG-DN--
BRL1_CD      DTHLSVSTLAGTPGYVPPEYYQSFRCSTKGDVYSYGVVLELLSGKKPIDPGEFGEDN--
BRL2_CD      DTHLSVSTLAGTPGYVPPEYYQSFRCSTKGDVYSYGVVLELLSGKRPTDKEEFG-DT--
BRL3_CD      DTHLSVSTLAGTPGYVPPEYYQSFRCSTKGDVYSYGVVLELLSGKKPIDPEEFGEDN--
FLS2_CD      STTASTSAFEGTIGYLAPEFAYMRKVTTKADVFSFGIIMMELMTKQRPTSLNDEDSQD-M
HAE_CD       KTPEAMSGIAGSCGYIAPEYVYTLRVNEKSDIYSFGVVLELVTGKQPTDS-ELGDKD--

EMS1_CD      NLVGWAIQKINQGK--AVDVIDPLLVSVALKNSQ-----LRLQLIAMLCI
BRI1_CD      NLVGWVKQHAK-LR--ISDVFDPELMKEDPALEI-----ELLQHLKVAVACL
BRL1_CD      NLVGWAKQLYREKR--GAEILDPELVT-DKSGDV-----ELFHYLKIASQCL
BRL2_CD      NLVGWSKMKAREGK--HMEVIDEDLLKEGSSSESLNEKEGFEGGVIVKEMLRYLEIALRCV
BRL3_CD      NLVGWAKQLYREKR--GAEILDPELVT-DKSGDV-----ELLHYLKIASQCL
FLS2_CD      TLRQLVEKSIGNGRKGMRVLDMELGDSIVSLKQEE-----AIEDFLKLCIFCT
HAE_CD       -MAKWVCTALDKCG--LEPVIDPKLDLKFKEEIS-----KVIHIGLLCT

EMS1_CD      AETPAKRPNMLDVLKALKEI-----
BRI1_CD      DDRAWRRPTMVQVMAMFKEIQAGSGIDSQSTIRSIEDGGFSTIEMVDMSIKEVPEGKL
BRL1_CD      DDRPFKRPTMIQLMAMFKEMKADTEEDE-----SLDEFSLKETPLVEESRDKEP----
BRL2_CD      DDFPSKRPNMLQVVASLRELGRS-----ENNSHSHSNL-----
BRL3_CD      DDRPFKRPTMIQVMTMFKELVQVDTEND-----SLDEFLLKETPLVEESRDKEP----
FLS2_CD      SSRPEDRPMNEILTHLMKLRG-----KANSFREDRNEDREV-----
HAE_CD       SPLPLNRPMSMRKVVIMLQEVSGAVPCSSPNTS-KRSKTGGKLSPPYTEDLNSV-----

```

**Supplemental Fig. S7.** Alignment of the EMS1 cytoplasmic domain with its four most closely related LRR-RLKs (BRI1, BRL1, BRL2 and BRL3) as well as FLS2 and HAE. Red letters indicate identified phosphorylation sites. Red letters highlighted in green indicate conserved phosphorylation sites. The red letter in cyan indicates S891 in BRI1, FLS2 S938 in blue, and HAE S856 in brown. Numbers indicate positions of identified *in vitro* phosphorylation sites in EMS1.
