# Supplementary material
Source: PubMed Central journal article supplement (PMC5210720)
Supplement: supp_pp.16.01219_PP2016-01219R2_Supplemental_Materialtbl1.pdf [file supp_pp.16.01219_PP2016-01219R2_Supplemental_Materialtbl1.pdf]

**Table S1. Calculation of FRET efficiency between SERK1 and EMS1 using two excitation wavelength scheme.** Average FRET efficiency,  $\langle E_{app} \rangle$ , for individually selected cellular membrane regions. Each row represents a membrane region within a measured cell. Average +/- SE is provided for the entire dataset.

| Region                                              | $\langle E_{app} \rangle$ | 1/Var  | Region | $\langle E_{app} \rangle$ | 1/Var  | Region | $\langle E_{app} \rangle$ | 1/Var  |
|-----------------------------------------------------|---------------------------|--------|--------|---------------------------|--------|--------|---------------------------|--------|
| 1                                                   | 0.353                     | 0.107  | 17     | 0.342                     | 9.946  | 33     | 0.268                     | 12.886 |
| 2                                                   | 0.204                     | 18.657 | 18     | 0.212                     | 27.235 | 34     | 0.217                     | 19.502 |
| 3                                                   | 0.189                     | 12.972 | 19     | 0.268                     | 14.106 | 35     | 0.200                     | 24.662 |
| 4                                                   | 0.239                     | 13.479 | 20     | 0.273                     | 18.012 | 36     | 0.238                     | 8.819  |
| 5                                                   | 0.211                     | 19.260 | 21     | 0.274                     | 14.205 | 37     | 0.261                     | 8.568  |
| 6                                                   | 0.196                     | 11.662 | 22     | 0.279                     | 12.646 | 38     | 0.194                     | 5.332  |
| 7                                                   | 0.222                     | 18.592 | 23     | 0.308                     | 16.892 | 39     | 0.207                     | 18.103 |
| 8                                                   | 0.196                     | 11.116 | 24     | 0.246                     | 8.060  | 40     | 0.351                     | 5.231  |
| 9                                                   | 0.293                     | 10.762 | 25     | 0.303                     | 7.402  | 41     | 0.228                     | 12.274 |
| 10                                                  | 0.226                     | 20.958 | 26     | 0.307                     | 14.000 | 42     | 0.223                     | 15.700 |
| 11                                                  | 0.253                     | 11.818 | 27     | 0.288                     | 16.833 | 43     | 0.178                     | 19.631 |
| 12                                                  | 0.298                     | 12.663 | 28     | 0.298                     | 13.085 | 44     | 0.282                     | 7.853  |
| 13                                                  | 0.133                     | 59.647 | 29     | 0.254                     | 15.690 | 45     | 0.333                     | 1.977  |
| 14                                                  | 0.299                     | 14.319 | 30     | 0.191                     | 29.252 | 46     | 0.201                     | 1.058  |
| 15                                                  | 0.366                     | 9.969  | 31     | 0.238                     | 26.856 | 47     | 0.263                     | 1.002  |
| 16                                                  | 0.255                     | 8.529  | 32     | 0.238                     | 23.967 | 48     | 0.295                     | 2.663  |
| <b>Average <math>E_{app} = 0.24 \pm 0.05</math></b> |                           |        |        |                           |        |        |                           |        |
