# Supplementary material
Source: PubMed Central journal article supplement (PMC5210720)
Supplement: supp_pp.16.01219_PP2016-01219R2_Supplemental_Materialtbl2.pdf [file supp_pp.16.01219_PP2016-01219R2_Supplemental_Materialtbl2.pdf]

**Table S2. Summary of *in vitro* auto- and trans-phosphorylation sites in the EMS1 kinase domain identified by mass spectrometry.**

| phospho site | phosphopeptide identified         | $\Delta M$ [ppm] | pRS site probability <sup>a)</sup> | pRS Score <sup>b)</sup> | $\Delta Cn$ | Xcorr | Charge | m/z [Da] | RT [min] | Ion matched | TP/PhosF | Activation <sup>c)</sup> |
|--------------|-----------------------------------|------------------|------------------------------------|-------------------------|-------------|-------|--------|----------|----------|-------------|----------|--------------------------|
| Thr 854      | WAMtKR                            | 0.06             | T(4): 100.0                        | 67                      | 0.00        | 2.37  | 2      | 436.6961 | 16.16    | 14/14       | 6/6      | CID                      |
| Ser 883      | GFVDQNLyFLsGSR                    | 0.52             | S(11): 100.0; S(13): 0.0           | 153                     | 0.00        | 3.19  | 2      | 841.8828 | 36.92    | 24/38       | 33/3     | CID                      |
| Ser 892      | SREPLsINIAMFEQPLLK                | 1.74             | S(1): 0.0; S(6): 100.0             | 135                     | 0.00        | 3.39  | 2      | 1083.557 | 46.9     | 36/50       | 47/9     | CID                      |
| Ser 1069     | LIsACESHVSTVIAGTFGYI<br>PPEYGQSAR | 0.33             | S(3): 81.7; S(7): 7.7              | 36                      | 0.00        | 3.54  | 3      | 1064.169 | 41       | 38/166      | 18/2     | CID                      |

**Identified transphosphorylated sites**

| phospho site       | phosphopeptide identified                      | $\Delta M$ [ppm] | pRS site probability <sup>a)</sup> | pRS Score <sup>b)</sup> | $\Delta Cn$ | Xcorr | Charge | m/z [Da] | RT [min] | Ion matched | TP/PhosF | Activation <sup>c)</sup> |
|--------------------|------------------------------------------------|------------------|------------------------------------|-------------------------|-------------|-------|--------|----------|----------|-------------|----------|--------------------------|
| Thr 854            | WAMtKR                                         | 0.83             | T(4): 100.0                        | 72                      | 0.00        | 2.17  | 2      | 436.6961 | 13.13    | 12/14       | 4/4      | CID                      |
| Ser 869            | RMEEsRLKGF                                     | 0.54             | S(5): 92.0                         | 86                      | 0.00        | 3.12  | 2      | 682.4216 | 31.53    | 32/46       | 10/6     | CID                      |
| Ser 883            | GFVDQNLyFLsGSR                                 | 0.96             | S(11): 99.9; S(13): 0.1            | 105                     | 0.00        | 4.41  | 2      | 841.8828 | 36.59    | 24/38       | 74/6     | CID                      |
| Ser 892            | REPLsINIAMFEQPLLK                              | 1.88             | S(4): 100.0                        | 65                      | 0.00        | 2.94  | 2      | 961.9903 | 50.53    | 17/44       | 15/3     | CID                      |
| Thr 914, Ser 918   | LGDIvEAtDHF <sup>s</sup> KK                    | 0.17             | T(8): 100.0; S(12): 100.0          | 99                      | 0.00        | 2.68  | 2      | 860.3733 | 21.57    | 28/50       | 82/5     | CID                      |
| Thr 930            | KNiIGDGGFGtVYK                                 | 0.97             | T(11): 98.7; Y(13): 1.3            | 66                      | 0.00        | 3.58  | 2      | 774.8773 | 27.23    | 24/38       | 22/3     | CID                      |
| Thr 941            | ACLPGEKtVAVK                                   | 0.54             | T(8): 100.0                        | 208                     | 0.00        | 2.91  | 3      | 451.5599 | 18.55    | 18/44       | 15/15    | CID                      |
| Ser 1069           | LIsACESHVSTVIAGTFGYI<br>PPEYGQSAR              | 0.33             | S(3): 81.7; S(7): 7.7              | 36                      | 0.00        | 3.54  | 3      | 1064.169 | 41       | 38/166      | 18/2     | CID                      |
| Ser 1073           | LISACE <sup>s</sup> HVSTVIAGTFGYI<br>PPEYGQSAR | 0.81             | S(10): 81.6; T(11): 13.5           | 77                      | 0.00        | 2.98  | 2      | 1595.751 | 41.04    | 27/83       | 23/8     | CID                      |
| Ser 1076, Thr 1077 | LISACESHV <sup>s</sup> tVIAGTFGYIP<br>PEYGQSAR | 3.1              | S(10): 87.4; T(11): 87.4           | 53                      | 0.00        | 3.98  | 2      | 1635.738 | 45.76    | 34/110      | 72/6     | CID                      |

<sup>a)</sup> pRS site Probabilities: For each phosphorylation site this is an estimation of the probability (0-100%) for the respective site being truly phosphorylated.

pRS Site Probabilities above 75% are good evidence that the respective site is truly phosphorylated.

<sup>b)</sup> pRS score: This peptide score is based on the cumulative binomial probability that the observed match is a random event.

The value of the pRS score strongly depends on the data scored, but usually scores above 50 give good evidence for a good PSM.

<sup>c)</sup> CID: collision-induced dissociation
