# Supplementary material
Source: PubMed Central journal article supplement (PMC5210720)
Supplement: supp_pp.16.01219_PP2016-01219R2_Supplemental_Materialtbl3.pdf [file supp_pp.16.01219_PP2016-01219R2_Supplemental_Materialtbl3.pdf]

**Table S3. Primers used in this study.**

| <b>Primer No.</b> | <b>Primer name</b> | <b>Purpose</b>   | <b>Sequence (5' to 3')</b>           |
|-------------------|--------------------|------------------|--------------------------------------|
| OMC 489           | Ds5-1              | genotyping       | CCGTTTACCGTTTTGTATATCCCG             |
| OMC 499           | EMS1 pf407         | genotyping       | AACAAACCCCGTCAGCTTTA                 |
| OMC500            | EMS1 cr453         | genotyping       | ACCGGAGAAGTGGTTGTAC                  |
| ZP1040            | EMS1 cr63          | genotyping       | CTCCATGGCAACAATGGCGGAACCTCGAAAAAG    |
| ZP565             | SALK_051989 LP     | genotyping       | AAAGACGGTAAGGAGAGCGAG                |
| ZP566             | SALK_119542 RP     | genotyping       | TACCAGATTAAAGCTGACGGG                |
| ZP166             | EMS1 pf1863        | Promoter cloning | CGAAGAACACGTCGAATCTTCTCC             |
| ZP92              | EMS1 pr1           | Promoter cloning | GTTCTTTTAGAGAAGGAGGAAGAAAACCTCGGAG   |
| ZP863             | SERK1 F            | promoter cloning | CTGCCGCGGTTACGAGACTTCAAATGGC         |
| ZP864             | SERK1 R            | promoter cloning | CGTGTCGACTTCAAACAACAATGCTAAATTTTCG   |
| ZP865             | SERK2 F            | promoter cloning | CTGCCGCGGCAAGAGGCGTGTATGGTTATGG      |
| ZP866             | SERK2 R            | promoter cloning | CGTGTCGACTTACCAAAAAAAAAAGCAAATTTCTCC |
| ZP97              | EMS1 cr3576        | cDNA cloning     | TATCTCCTTAAGAGCCTTCAACACATCAAGC      |
| ZP915             | EMS1 cf1           | cDNA cloning     | CACCGTCGACATGGCGTTTCTTACCG           |
| ZP916             | SERK1 cDNA F       | cDNA cloning     | CACCGTCGACATGGAGTCGAGTTATGTGGTGT     |
| ZP917             | SERK1 cDNA R       | cDNA cloning     | CCTTGGACCAGATAACTCAACG               |
| ZP918             | SERK2 cDNA F       | cDNA cloning     | CACCATGGGGAGAAAAAAGTTTGAAGC          |
| ZP919             | SERK2 cDNA R       | cDNA cloning     | TCTTGGACCAGACAACCTCCATAG             |
| ZP1108            | SERK1-nEYFP F      | BiFC             | CACCCCATGGTTCGAGTCGAGTTATGTGGTG      |
| ZP1109            | SERK1-nEYFP R      | BiFC             | ACCGTCGACTCCTTGGACCAGATAACTCAAC      |
| ZP1258            | SERK3-nEYFP F      | BiFC             | CACCCTCGAGCATGGAACGAAGATTA           |
| ZP1259            | SERK3-nEYFP R      | BiFC             | GCGGTACCGTCTTGGACCCGAGGGG            |
| ZP802             | EMS1-cEYFP F       | BiFC             | GATCTCGAGCATGGCGTTTCTTACCGCATTGTT    |
| ZP804             | EMS1-cEYFP R       | BiFC             | GCGGTACCGTATCTCCTTAAGAGCCTTCAAC      |
| ZP803             | EMS1 cf64          | BiFC             | GATCTCGAGCTGATCTTAGCTCGGAAACAAC      |
| ZP1041            | EMS1 cr2748        | BiFC             | CAGGTACCATGATCTGTAGCCTCGACAATATC     |
| ZP2113            | SERK1 SPf          | BiFC             | TAGCTGTTTGCCAACCGGTCAAC              |
| ZP2114            | SERK1 SPr          | BiFC             | GCCCATGGCATTAGCAGAAGCAAG             |
| ZP2115            | SERK1 cf82         | BiFC             | CAGTCGACTTGGAAGGTGATGCTTT            |
| ZP2116            | SERK1 cr900        | BiFC             | GCGGTACCTTAATCACTCGCCAC              |
| ZP2117            | SERK1 cf526        | BiFC             | CAGTCGACGGCTCCTTCTCACTC              |
| ZP2118            | SERK1 cr1767       | BiFC             | GCGGTACCTTACCTTGGACCAGA              |
| ZP2119            | EMS1 cf 2386       | BiFC             | GACTCGAGCTGATCCTTCCAAGGCATTG         |
| ZP2120            | EMS1 cr 3579       | BiFC             | CGGGTACCTCATATCTCCTTAAGAGCCT         |
| ZP2424            | EMS1sp-CFP         | FRET             | GCCCTTGCTCACAACAATGGCGGAACT          |
| ZP2425            | EMS1sp-CFP         | FRET             | TCCGCCATTGTTGTGAGCAAGGGCGAG          |
| ZP2426            | EMS1sp-CFP-EMS1    | FRET             | GATCTCGAGTCTTGTACAGCTCGTCCAT         |
| ZP2012            | SERK-YFP           | FRET             | AGCCATGGTCATGGAGTCGAGTTATG           |
| ZP2013            | SERK-YFP           | FRET             | GCGGTACCGCCTTGGACCAGATAACT           |

|        |            |                 |                                   |
|--------|------------|-----------------|-----------------------------------|
| ZP1996 | T854A F    | Overlapping PCR | AGATGGGCTATGGCAAAGAGAGTGAAG       |
| ZP1997 | T854A R    |                 | CTTCACTCTCTTTGCCATAGCCCATCT       |
| ZP1998 | S869A F    | Overlapping PCR | CGAATGGAGGAAGCCAGATTGAAAGGG       |
| ZP1999 | S869A R    |                 | CCCTTTCAATCTGGCTTCCTCCATTGC       |
| ZP2105 | S883A F    | Overlapping PCR | CTGTATTTCTTAGCTGGAAGCAGATCA       |
| ZP2106 | S883A R    |                 | TGATCTGCTTCCAGCTAAGAAATACAG       |
| ZP2000 | S892A F    | Overlapping PCR | AGGGAGCCTTTAGCCATCAATATAGCA       |
| ZP2001 | S892A F    |                 | TGCTATATTGATGGCTAAAGGCTCCCT       |
| ZP2004 | T941A F    | Overlapping PCR | CCAGGTGAGAAAGCAGTAGCGGTGAAG       |
| ZP2005 | T941A R    |                 | CTTCACCGCTACTGCTTTCTCACCTGG       |
| ZP2002 | S918A F    | Overlapping PCR | ACAGATCATTTTCGCTAAGAAGAACATT      |
| ZP2003 | S918A R    |                 | AATGTTCTTCTTAGCGAAATGATCTGT       |
| ZP2109 | T930A F    | Overlapping PCR | GGTGGTTTTGGGGCGGTTTACAAAGCT       |
| ZP2110 | T930A R    |                 | AGCTTTGTAAACCGCCCCAAAACCACC       |
| ZP2004 | T941A F    | Overlapping PCR | CCAGGTGAGAAAGCAGTAGCGGTGAAG       |
| ZP2005 | T941A R    |                 | CTTCACCGCTACTGCTTTCTCACCTGG       |
| ZP 807 | S1069A F   | Overlapping PCR | GCTAGCAAGACTAATTGCTGCCTGTGAATCCC  |
| ZP 808 | S1069A R   |                 | GGGATTCACAGGCAGCAATTAGTCTTGCTAGC  |
| ZP 809 | S1073A F   | Overlapping PCR | GTGCCTGTGAAGCCCATGTTAGTACAGTC     |
| ZP 810 | S1073A R   |                 | GACTGTACTAACATGGGCTTCACAGGCAC     |
| ZP 811 | S1076A F   | Overlapping PCR | GTGAATCCCATGTTGCTACAGTCATAGCAG GG |
| ZP 812 | S1076A R   |                 | CCCTGCTATGACTGTAGCAACATGGGATTCAC  |
| ZP 813 | T1077A F   | Overlapping PCR | GAATCCCATGTTAGTGCCGTCATAGCAGGGAC  |
| ZP 814 | T1077A R   |                 | GTCCCTGCTATGACGGCACTAACATGGGATTC  |
| ZP2111 | S1160A F   | Overlapping PCR | GCTTTGAAGAACGCTCAGCTTCGTCTG       |
| ZP2112 | S1160A R   |                 | CAGACGAAGCTGAGCGTTCTTCAAAGC       |
| ZP819  | EMS1 CD F  | kinase domain   | CACCGGATCCCGCAGATGGGCTAT          |
| ZP818  | EMS1 CD R  | kinase domain   | CGCTCGAGGTACCGGCTCATATCTCC        |
| ZP1919 | SERK1 CD F | kinase domain   | TCCCATATGATTTTCTTCGATGT           |
| ZP1920 | SERK1 CD R | kinase domain   | ATAAAGCTTTTACCTTGGACCAG           |
| ZP1921 | SERK2 CD F | kinase domain   | AATCATATGGACCCTGAGGTTCA           |
| ZP1922 | SERK2 CD R | kinase domain   | CCGAAGCTTTTATCTTGGACCAG           |
| ZP1960 | K330E F    | Overlapping PCR | TGTTGCTGTCGAGAGACTGAAGG           |
| ZP1961 | K330E R    |                 | CCTTCAGTCTCTCGACAGCAACA           |
