# Supplementary material
Source: PubMed Central journal article supplement (PMC5210720)
Supplement: supp_pp.16.01219_PP2016-01219R2_Supplemental_Materialtbl4.pdf [file supp_pp.16.01219_PP2016-01219R2_Supplemental_Materialtbl4.pdf]

**Table S4. Constructs generated in this study.**

| <b>Construct</b>                         | <b>Construct backbone</b> | <b>Purpose</b>        |
|------------------------------------------|---------------------------|-----------------------|
| <i>SERK1:SERK1</i>                       | pEarlyGate301             | Complementary assay   |
| <i>SERK2:SERK2</i>                       | pEarlyGate301             | Complementary assay   |
| <i>35S:EMS1-nEYFP</i>                    | pSAT4-nEYFP-N1            | BiFC                  |
| <i>35S:EMS1-cEYFP</i>                    | pSAT1-cEYFP-N1            | BiFC                  |
| <i>35S:SERK1-cEYFP</i>                   | pSAT1-cEYFP-N1            | BiFC                  |
| <i>35S:SERK2-cEYFP</i>                   | pSAT1-cEYFP-N1            | BiFC                  |
| <i>35S:SERK3-cEYFP</i>                   | pSAT1-cEYFP-N1            | BiFC                  |
| <i>35S:SERK1-nEYFP</i>                   | pSAT4-nEYFP-N1            | BiFC                  |
| <i>35S:EMS1-LRR-nEYFP</i>                | pSAT4-nEYFP-C1            | BiFC                  |
| <i>35S:EMS1-CD-nEYFP</i>                 | pSAT4-nEYFP-N1            | BiFC                  |
| <i>35S:SERK1-LRR-cEYFP</i>               | pSAT1-cEYFP-C1            | BiFC                  |
| <i>35S:SERK1-CD-cEYFP</i>                | pSAT1-cEYFP-N1            | BiFC                  |
| <i>EMS1-CFP</i>                          | pSAT1                     | FRET                  |
| <i>SERK1-YFP</i>                         | pSAT1                     | FRET                  |
| <i>SERK1-CD-His</i>                      | pET28a                    | Phosphorylation assay |
| <i>SERK1-CD<sup>K330E</sup>-His</i>      | pET28a                    | Phosphorylation assay |
| <i>SERK2-CD-His</i>                      | pET28a                    | Phosphorylation assay |
| <i>EMS1-CD-GST</i>                       | pGEX-4T-2                 | Phosphorylation assay |
| <i>EMS1-CD<sup>T854A</sup></i>           | pGEX-4T-2                 | Phosphorylation assay |
| <i>EMS1-CD<sup>S869A</sup></i>           | pGEX-4T-2                 | Phosphorylation assay |
| <i>EMS1-CD<sup>S883A</sup></i>           | pGEX-4T-2                 | Phosphorylation assay |
| <i>EMS1-CD<sup>S892A</sup></i>           | pGEX-4T-2                 | Phosphorylation assay |
| <i>EMS1-CD<sup>T914A</sup></i>           | pGEX-4T-2                 | Phosphorylation assay |
| <i>EMS1-CD<sup>S918A</sup></i>           | pGEX-4T-2                 | Phosphorylation assay |
| <i>EMS1-CD<sup>T930A</sup></i>           | pGEX-4T-2                 | Phosphorylation assay |
| <i>EMS1-CD<sup>T941A</sup></i>           | pGEX-4T-2                 | Phosphorylation assay |
| <i>EMS1-CD<sup>S1069A</sup></i>          | pGEX-4T-2                 | Phosphorylation assay |
| <i>EMS1-CD<sup>S1073A</sup></i>          | pGEX-4T-2                 | Phosphorylation assay |
| <i>EMS1-CD<sup>S1076A</sup></i>          | pGEX-4T-2                 | Phosphorylation assay |
| <i>EMS1-CD<sup>T1077A</sup></i>          | pGEX-4T-2                 | Phosphorylation assay |
| <i>EMS1-CD<sup>S1160A</sup></i>          | pGEX-4T-2                 | Phosphorylation assay |
| <i>EMS1-CD<sup>T854A/S883A</sup></i>     | pGEX-4T-2                 | Phosphorylation assay |
| <i>EMS1-CD<sup>S1069A/S1076A</sup></i>   | pGEX-4T-2                 | Phosphorylation assay |
| <i>EMS1:EMS1<sup>T854A</sup></i>         | pGWB1                     | Complementary assay   |
| <i>EMS1:EMS1<sup>T930A</sup></i>         | pGWB1                     | Complementary assay   |
| <i>EMS1:EMS1<sup>S1069A</sup></i>        | pGWB1                     | Complementary assay   |
| <i>EMS1:EMS1<sup>S1076A</sup></i>        | pGWB1                     | Complementary assay   |
| <i>EMS1:EMS1<sup>S1069A/S1076A</sup></i> | pGWB1                     | Complementary assay   |
